# Supplementary material for: Lipid Supplement in the Cultural Condition Facilitates the Porcine iPSC Derivation through cAMP/PKA/CREB Signal Pathway
Source: MDPI journal article supplement (doi:10.3390/ijms19020509), 2018-02-08
Supplement: s1 [file s1]

## Supplementary Information

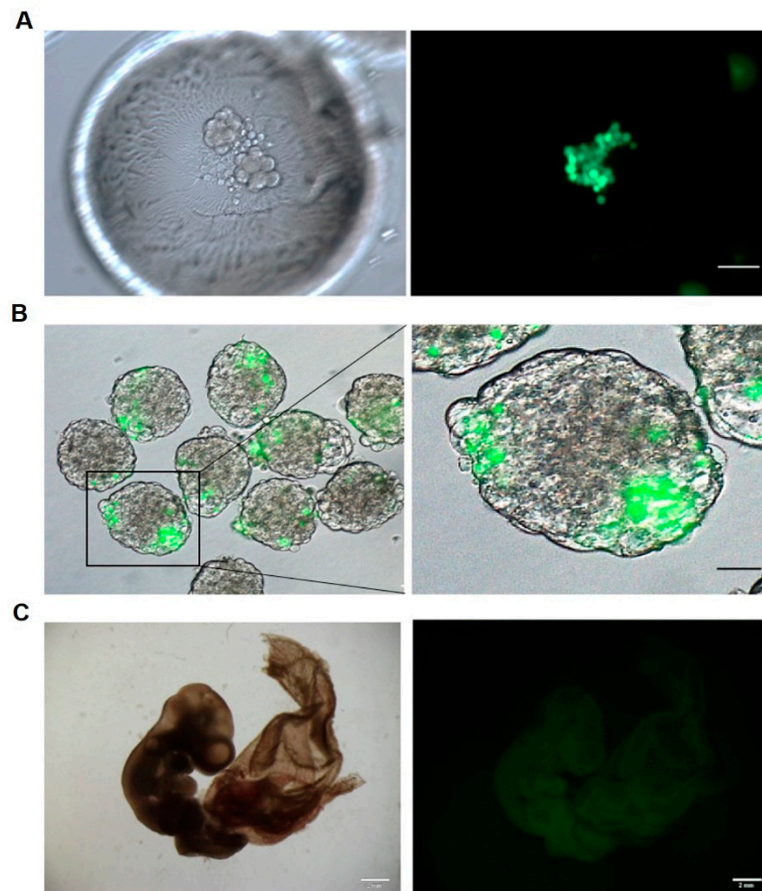

**Figure S1.** Aggregation of porcine iPSCs with mouse embryos. (A) Aggregation of LpiPSCs with two mouse embryos at 8-cell stage in micro wells. Green fluorescence represents LpiPSCs. Scale bar, 200  $\mu\text{m}$ . (B) Reconstructed blastocysts. Green fluorescence represents LpiPSCs. Scale bar, 50  $\mu\text{m}$ . (C) Reconstructed embryos at E 13.5. No green fluorescence was detected. Scale bar, 2 mm.

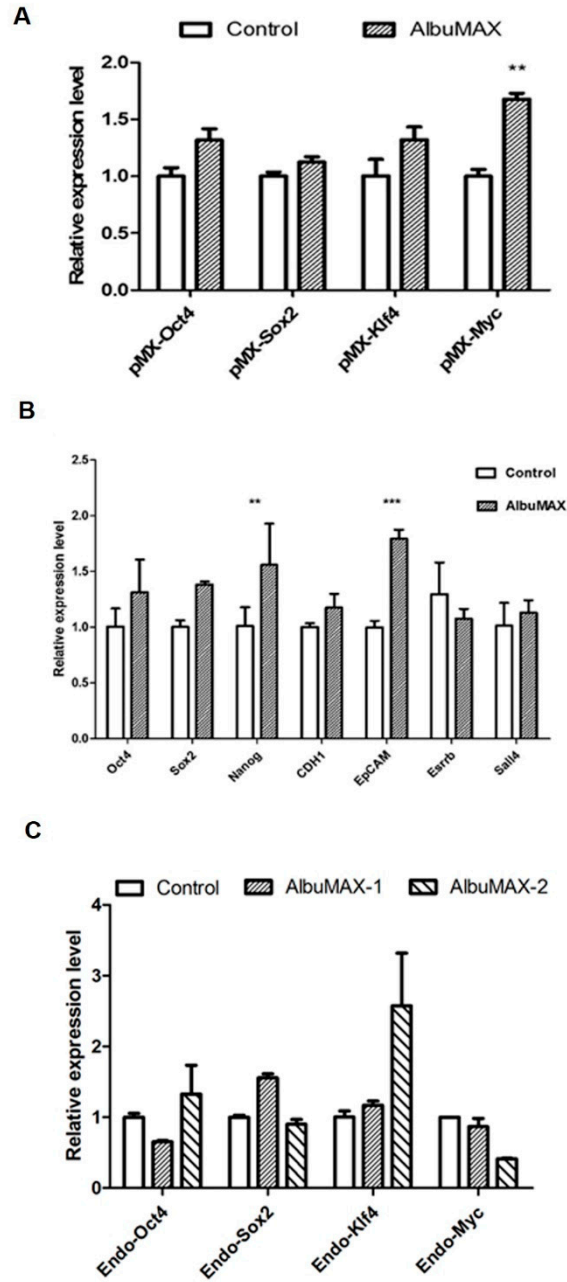

**Figure S2.** Examination of gene expression by quantitative RT-PCR. (A) Quantitative RT-PCR analyzed the expression of exogenous genes in LpiPSCs. \*\*  $p < 0.01$ . (B) Quantitative RT-PCR analyzed the expression of pluripotency genes in LpiPSCs. \*\*  $p < 0.01$ ; \*\*\*  $p < 0.001$ . (C) Gene expression of endogenous genes in porcine iPSCs. AlbuMAX-1 and AlbuMAX-2 represent porcine iPSCs derived in medium without AlbuMAX were cultured in the AlbuMAX medium for three and six passages respectively.
